# Supplementary material
Source: ML conference proceedings conference paper supplement (https://openaccess.thecvf.com/content/WACV_2020/html/James_Fourier_Based_Pre-Processing_WACV_2020_paper.html)
Supplement: Supplementary file 1 [file James_Fourier_Based_Pre-Processing_WACV_2020_supplemental.pdf]

Archive with 34 entries (27 files):
- paper130_supplemental/
- paper130_supplemental/paper130_supplemental.pdf
- paper130_supplemental/MotionReduction/
- paper130_supplemental/MotionReduction/README.txt.txt
- paper130_supplemental/MotionReduction/Videos/
- paper130_supplemental/MotionReduction/Videos/Eye.mp4
- paper130_supplemental/MotionReduction/Videos/Dices.mp4
- paper130_supplemental/MotionReduction/Videos/Math.mp4
- paper130_supplemental/MotionReduction/Videos/Middle.mp4
- paper130_supplemental/MotionReduction/Videos/Elephant.mp4
- paper130_supplemental/Collage_Mean_Images/
- paper130_supplemental/Collage_Mean_Images/Images/
- paper130_supplemental/Collage_Mean_Images/Images/Small_Mean_Images.jpg
- paper130_supplemental/Collage_Mean_Images/Images/Math_SSIM_Dissimilarity.jpg
- paper130_supplemental/Collage_Mean_Images/Images/Elephant_Mean_Images.jpg
- paper130_supplemental/Collage_Mean_Images/Images/Tiny_Mean_Images.jpg
- paper130_supplemental/Collage_Mean_Images/Images/Math_Mean_Images.jpg
- paper130_supplemental/Collage_Mean_Images/Images/Middle_SSIM_Dissimilarity.jpg
- paper130_supplemental/Collage_Mean_Images/Images/Elephant_SSIM_Dissimilarity.jpg
- paper130_supplemental/Collage_Mean_Images/Images/Small_SSIM_Dissimilarity.jpg
- paper130_supplemental/Collage_Mean_Images/Images/Eye_SSIM_Dissimilarity.jpg
- paper130_supplemental/Collage_Mean_Images/Images/Eye_Mean_Images.jpg
- paper130_supplemental/Collage_Mean_Images/Images/Tiny_SSIM_Dissimilarity.jpg
- paper130_supplemental/Collage_Mean_Images/Images/Middle_Mean_Images.jpg
- paper130_supplemental/Collage_Mean_Images/readme.txt
- paper130_supplemental/Restoration_Videos/
- paper130_supplemental/Restoration_Videos/Videos/
- paper130_supplemental/Restoration_Videos/Videos/Tiny.mp4
- paper130_supplemental/Restoration_Videos/Videos/Small.mp4
- paper130_supplemental/Restoration_Videos/Videos/Middle.mp4
- paper130_supplemental/Restoration_Videos/Videos/Math.mp4
- paper130_supplemental/Restoration_Videos/Videos/Elephant.mp4
- paper130_supplemental/Restoration_Videos/Videos/Eye.mp4
- paper130_supplemental/Restoration_Videos/readme.txt
