# Supplementary material
Source: ML conference proceedings conference paper supplement (https://openaccess.thecvf.com/content/WACV_2020/html/James_Fourier_Based_Pre-Processing_WACV_2020_paper.html)
Supplement: Supplementary file 1 [file James_Fourier_Based_Pre-Processing_WACV_2020_supplemental.pdf › paper130_supplemental/Collage_Mean_Images/readme.txt]

* "Images" folder contains 20 images, two for each of the videos listed in Table 1 of the paper.


Set1 - Naming format : VideoName_Mean_Images.jpg

	* Each image is a collage of the following 7 images
		- A Ground Truth image showing the undistorted static background
		- Mean of the input Video 
		- Outputs of restoration methods FM, LWB, SBR, FM+LWB, FM+SBR

Set2 - Naming format : VideoName_SSIM_Dissimilarity
		-Intention of this set is to highlight the geometrical distortions introduced by each method.
		- Each individual image in the collage, except the ground truth is created in the following manner
			- 0.7*RestoredImage + 0.3*(1-SSIM_Map).*Red_Color. Hence, wherever the ssim values are lower, you will those regions getting highlighted with brighter red color.
			- You can observe that both LWB and SBR do not reconstruct the background correctly. Particularly, SBR-RPCA gives a very stable video, but is significantly 
                           distorted wrt the ground truth. However, the resconsruction quality gets significantly improved with the Fourier based pre-processing step is used.


*Please note: If the files are sorted alphabetically or chronologically, VideoName_SSIM_Dissimilarity and  VideoName_Mean_Images will get arranged back to back for each video. It will be easy to toggle between the restoration result and corresponding SSIM dissimilarity map in the image viwer.
