# Supplementary material
Source: ML conference proceedings conference paper supplement (https://openaccess.thecvf.com/content/WACV_2020/html/James_Fourier_Based_Pre-Processing_WACV_2020_paper.html)
Supplement: Supplementary file 1 [file James_Fourier_Based_Pre-Processing_WACV_2020_supplemental.pdf › paper130_supplemental/Restoration_Videos/readme.txt]

* "Videos" folder contains 10 videos, one for each of the videos listed in Table 1 of the paper.

* Each video is a collage of the following 7 videos
	- A Ground Truth image showing the undistorted static background
	- Mean of the input Video 
	- Outputs of restoration methods FM, LWB, SBR, FM+LWB, FM+SBR


*Each video is of 6 seconds.
	-First 2 second segment shows the restoration video output of each method
	-The next 2 second segment shows the mean of each restoration method
	-The next 2 seconds highlights the local SSIM errors of restoration result of each method wrt Ground Truth. The video segment is created in the following manner
		- 0.7*RestoredImage + 0.3*(1-SSIM_Map).*Red_Color. Hence, wherever the ssim values are lower, one will see those regions getting highlighted with brighter red color.
		- You can observe that both LWB and SBR do not reconstruct the background correctly. Particularly, SBR-RPCA gives a very stable video, but is significantly 
                           distorted wrt the ground truth. However, the resconsruction quality gets significantly improved with the Fourier based pre-processing step is used.
