# Supplementary material
Source: ML conference proceedings conference paper supplement (https://openaccess.thecvf.com/content/WACV_2020/html/James_Fourier_Based_Pre-Processing_WACV_2020_paper.html)

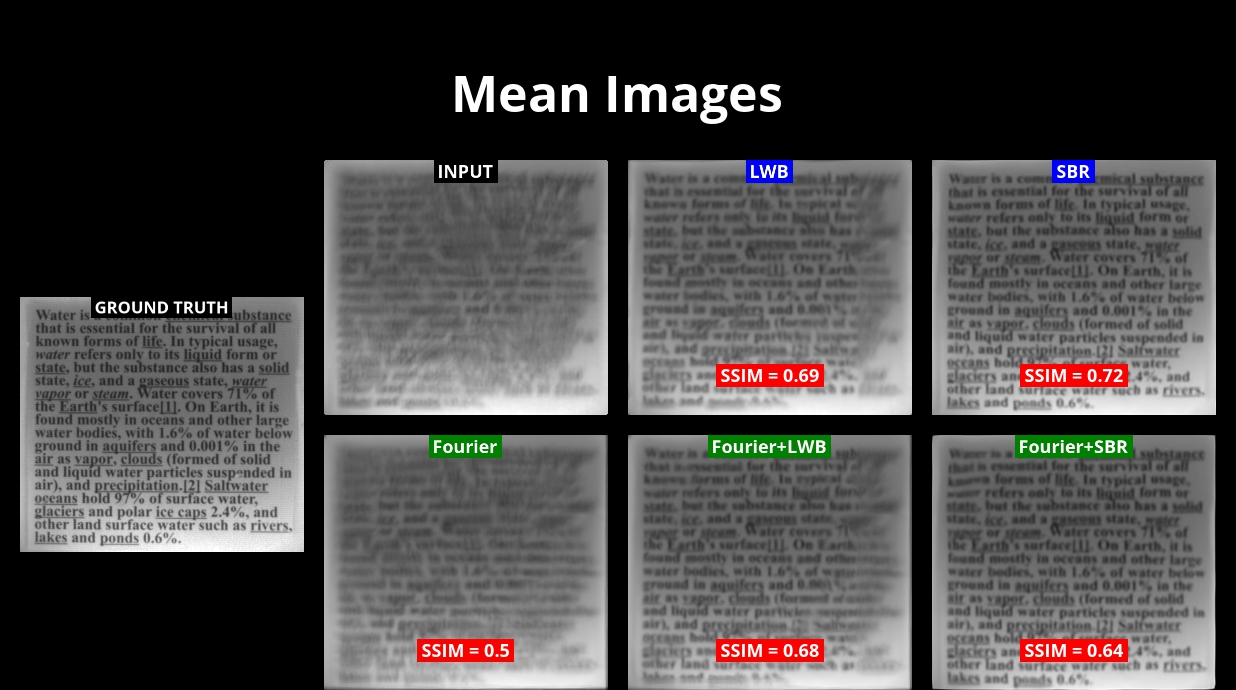

Supplement: Supplementary file 1 [file James_Fourier_Based_Pre-Processing_WACV_2020_supplemental.pdf › paper130_supplemental/Collage_Mean_Images/Images/Small_Mean_Images.jpg]

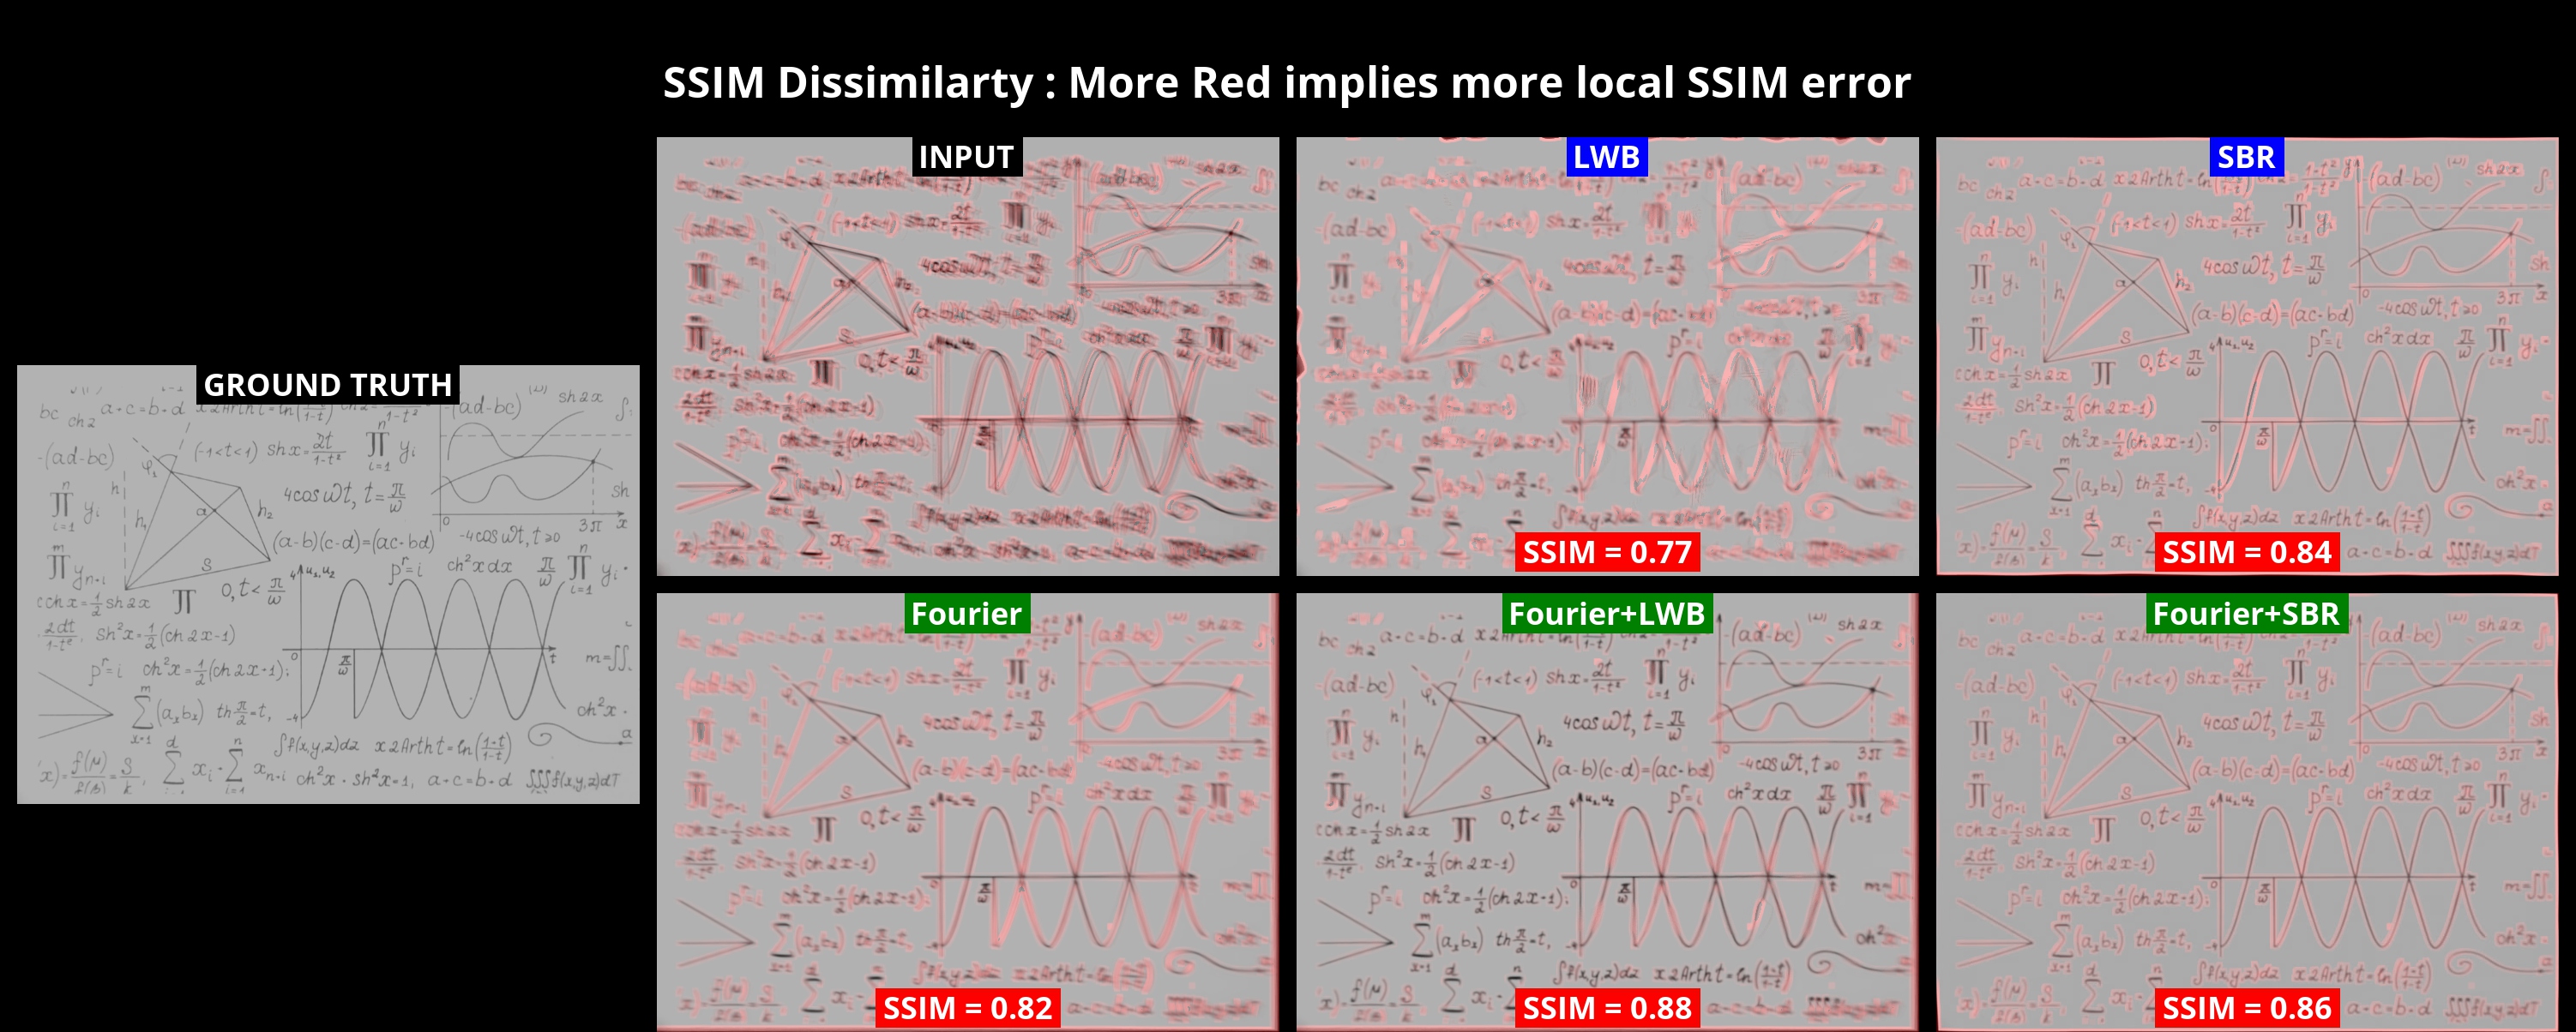

Supplement: Supplementary file 1 [file James_Fourier_Based_Pre-Processing_WACV_2020_supplemental.pdf › paper130_supplemental/Collage_Mean_Images/Images/Math_SSIM_Dissimilarity.jpg]

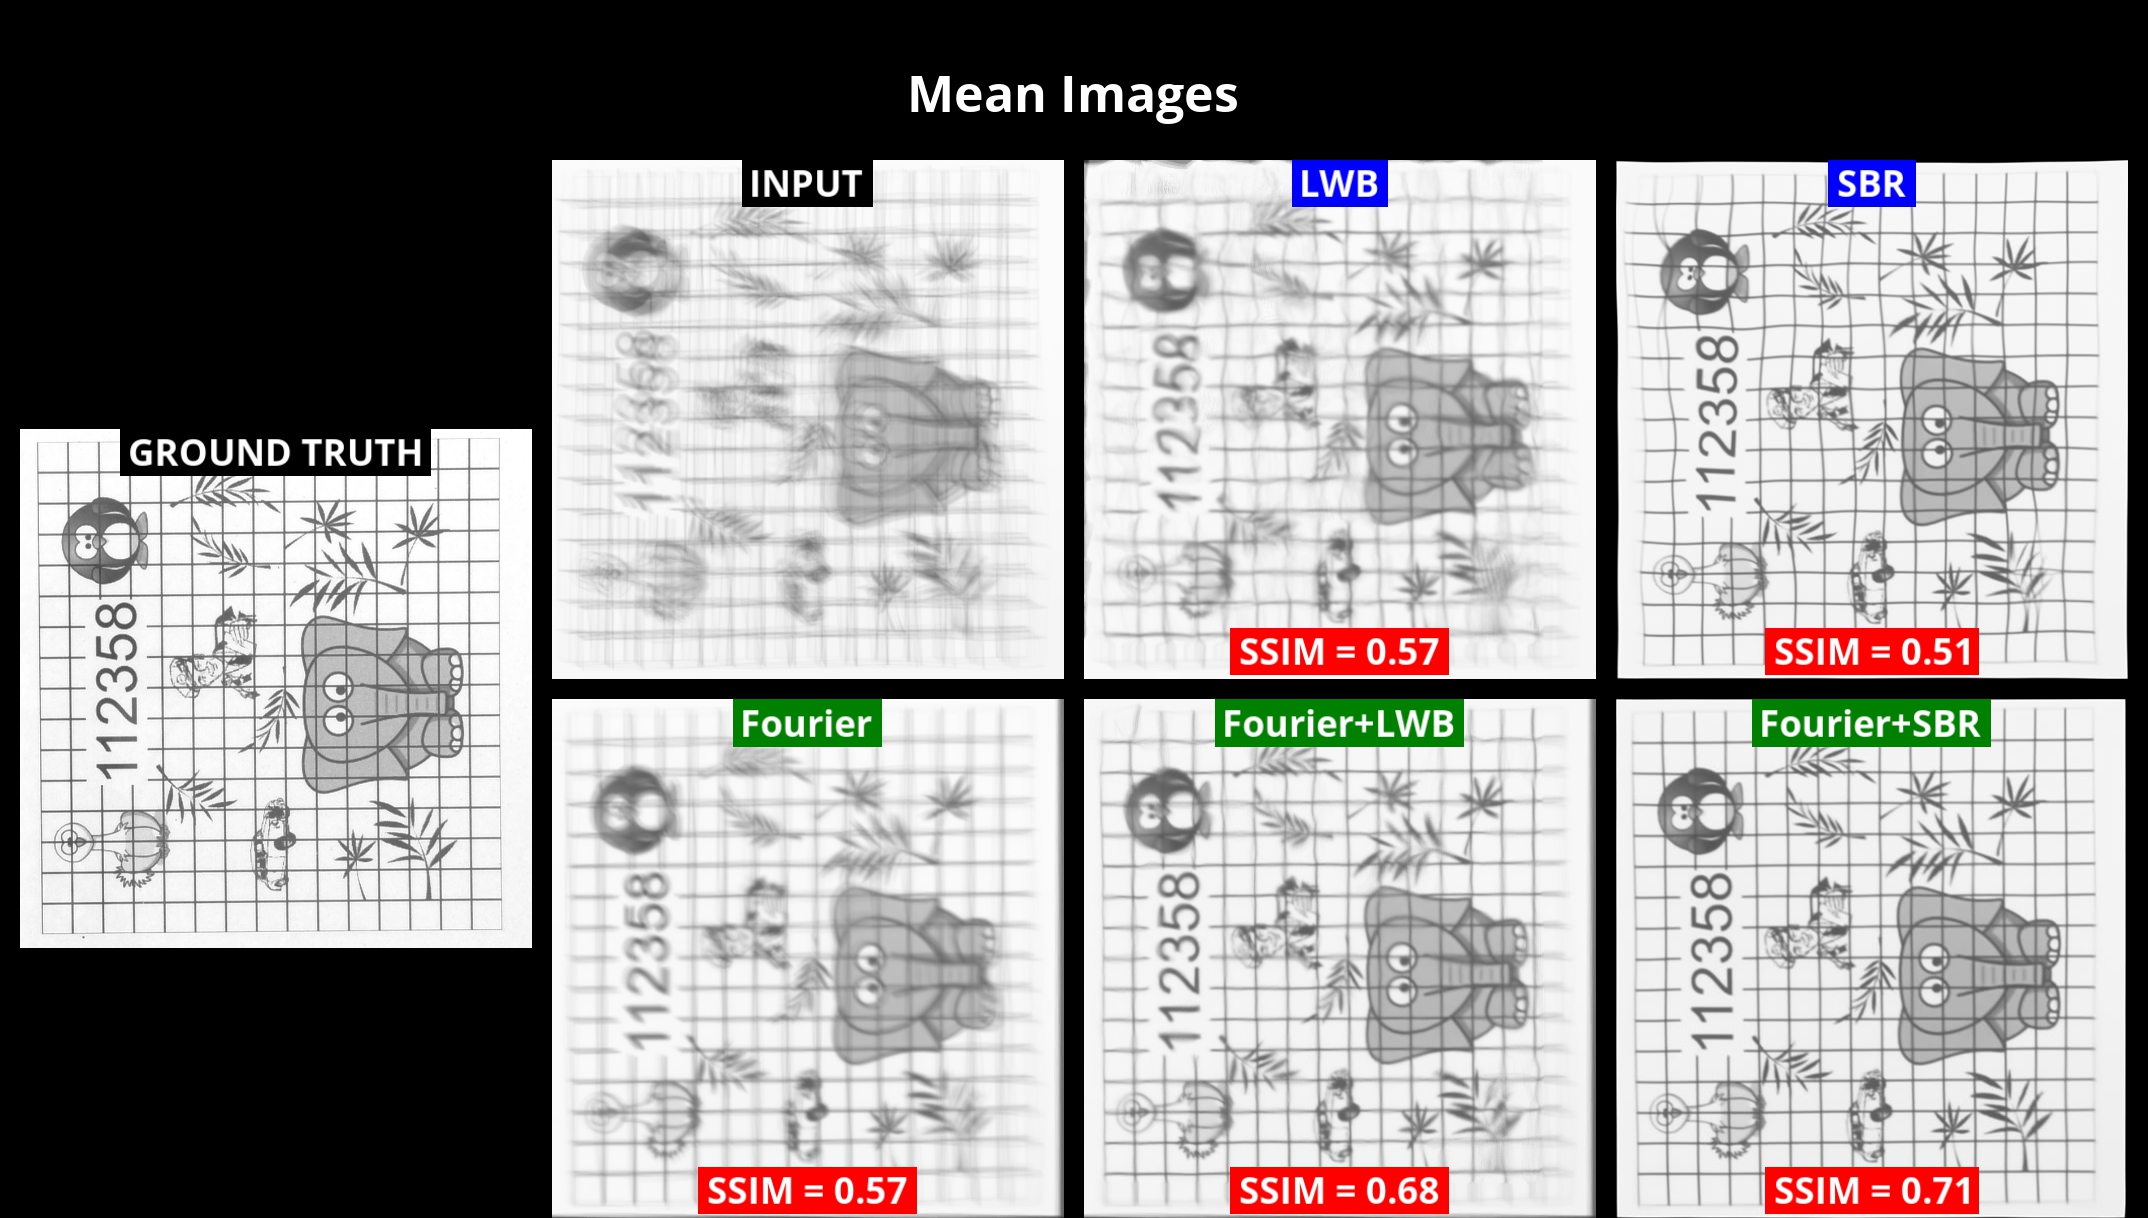

Supplement: Supplementary file 1 [file James_Fourier_Based_Pre-Processing_WACV_2020_supplemental.pdf › paper130_supplemental/Collage_Mean_Images/Images/Elephant_Mean_Images.jpg]

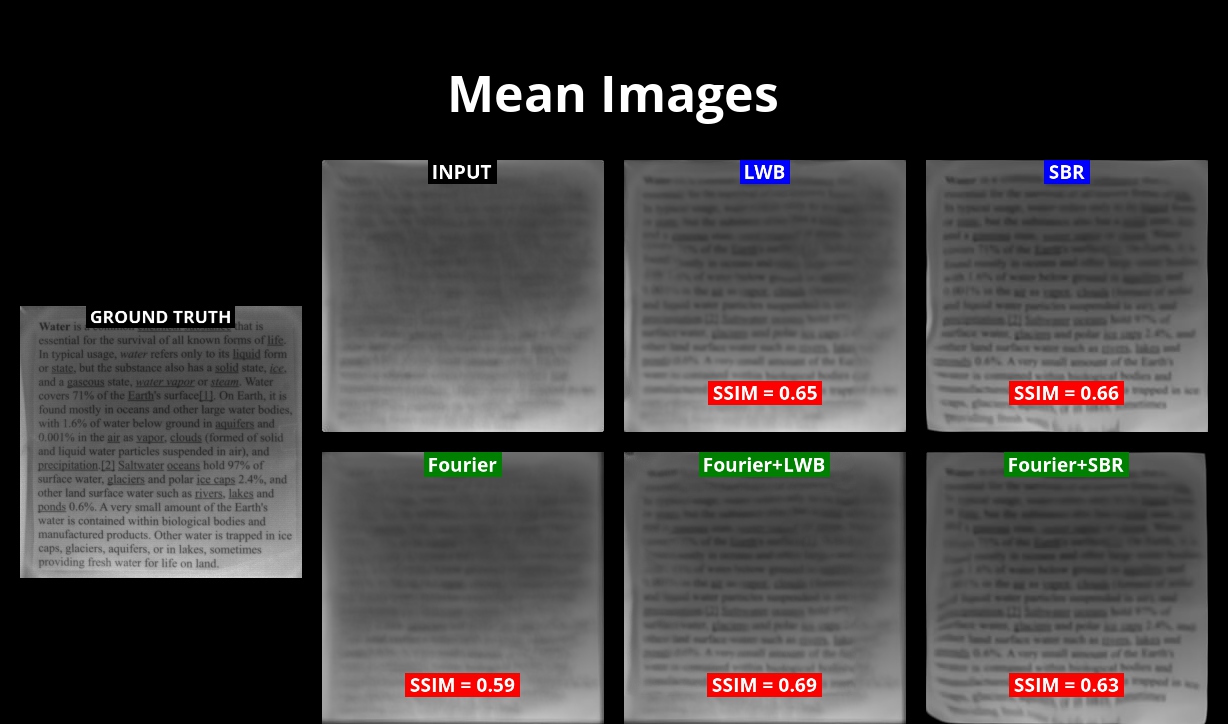

Supplement: Supplementary file 1 [file James_Fourier_Based_Pre-Processing_WACV_2020_supplemental.pdf › paper130_supplemental/Collage_Mean_Images/Images/Tiny_Mean_Images.jpg]

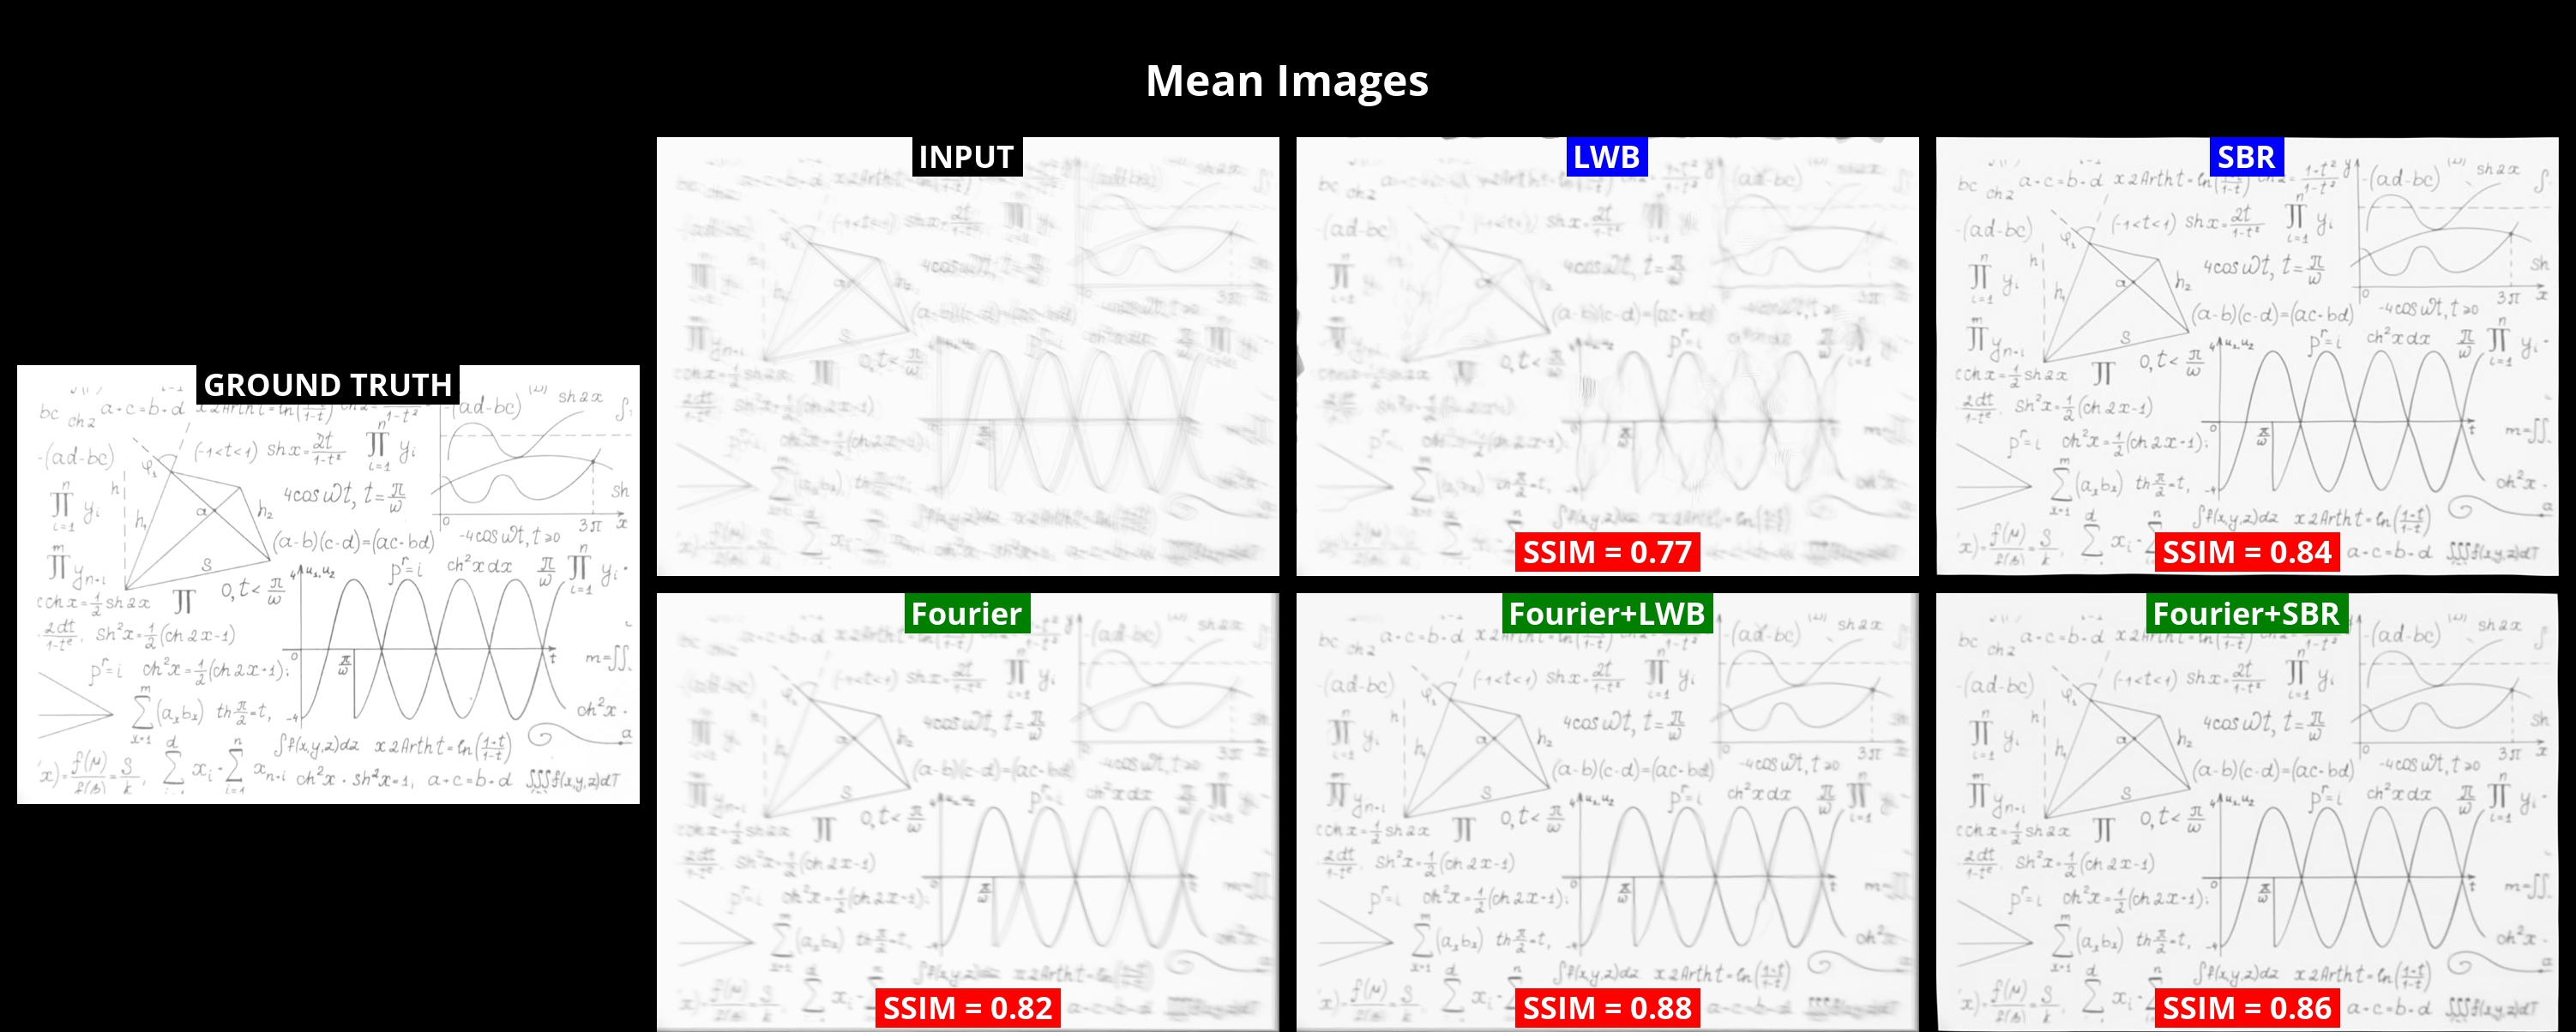

Supplement: Supplementary file 1 [file James_Fourier_Based_Pre-Processing_WACV_2020_supplemental.pdf › paper130_supplemental/Collage_Mean_Images/Images/Math_Mean_Images.jpg]

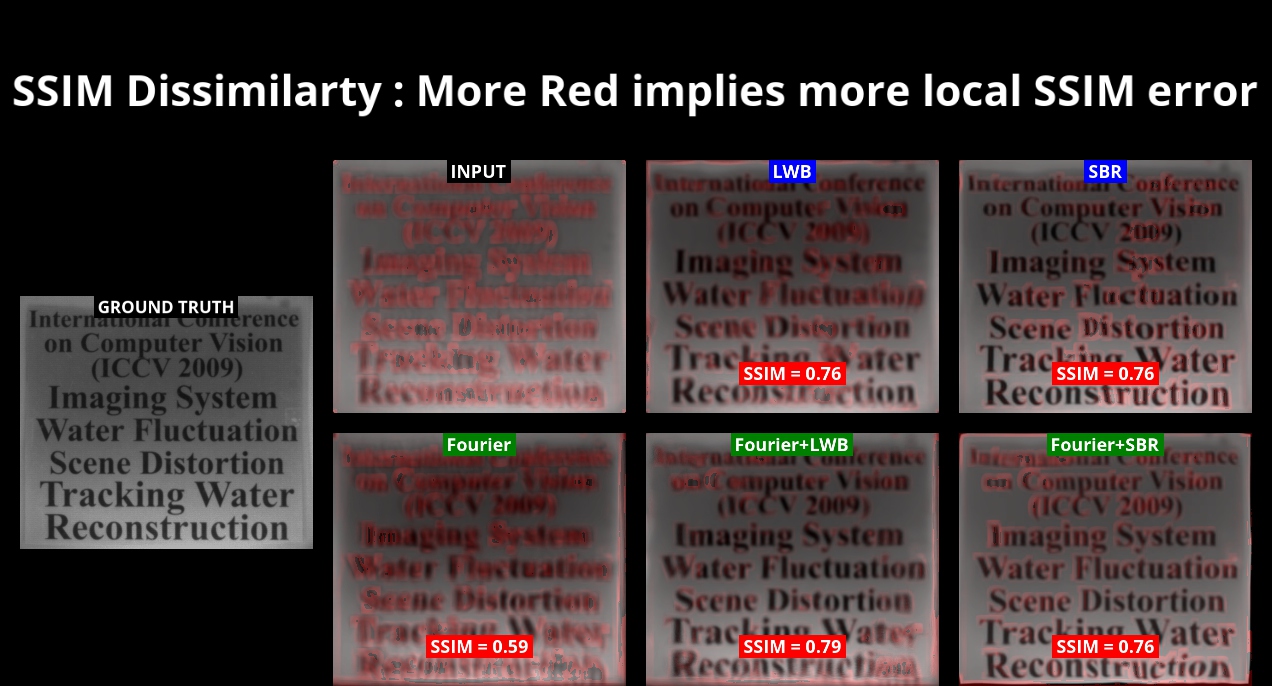

Supplement: Supplementary file 1 [file James_Fourier_Based_Pre-Processing_WACV_2020_supplemental.pdf › paper130_supplemental/Collage_Mean_Images/Images/Middle_SSIM_Dissimilarity.jpg]

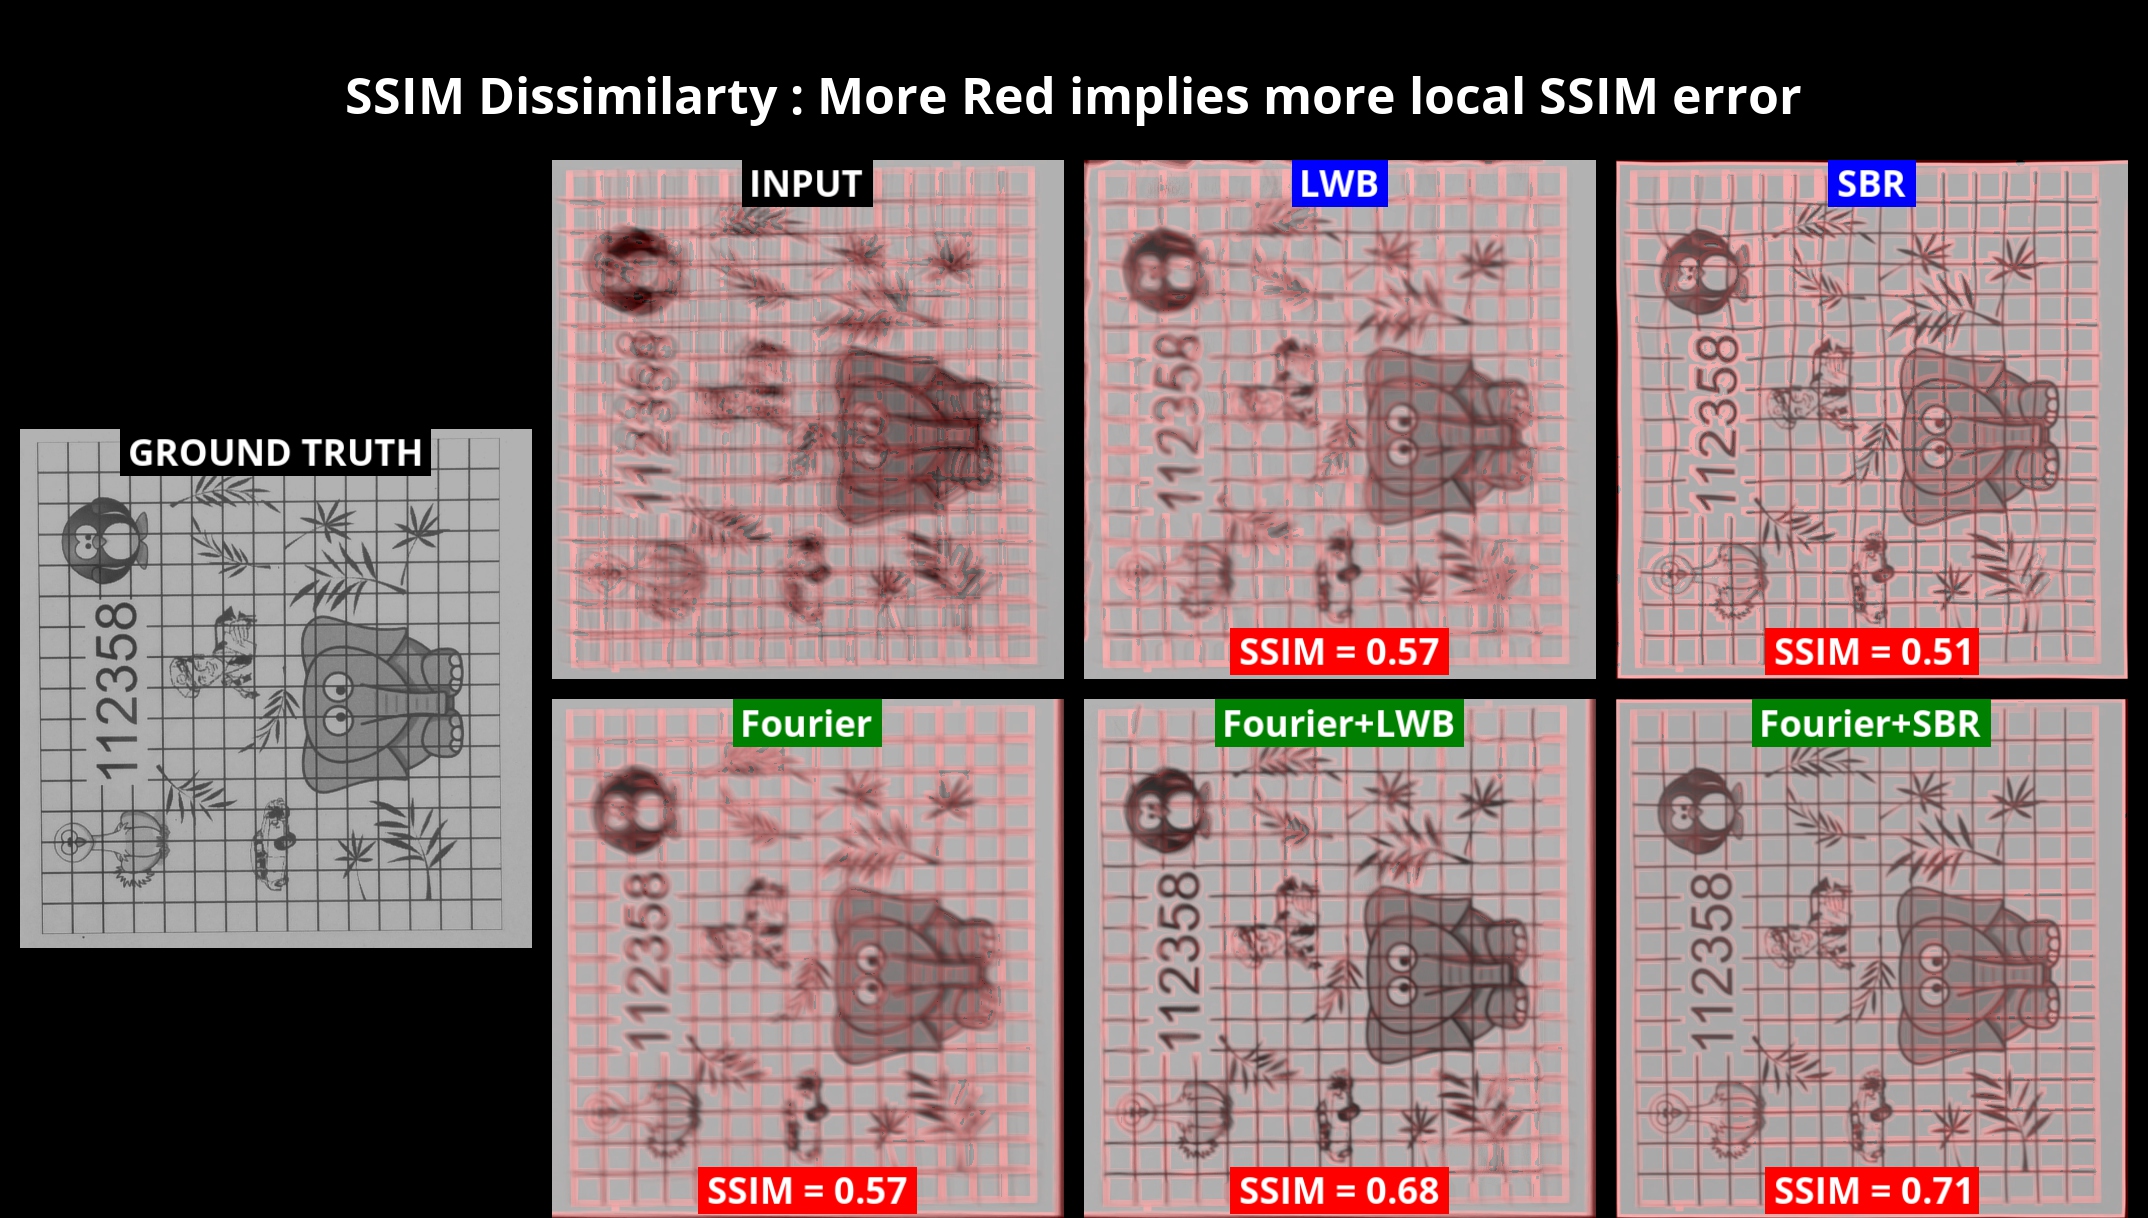

Supplement: Supplementary file 1 [file James_Fourier_Based_Pre-Processing_WACV_2020_supplemental.pdf › paper130_supplemental/Collage_Mean_Images/Images/Elephant_SSIM_Dissimilarity.jpg]

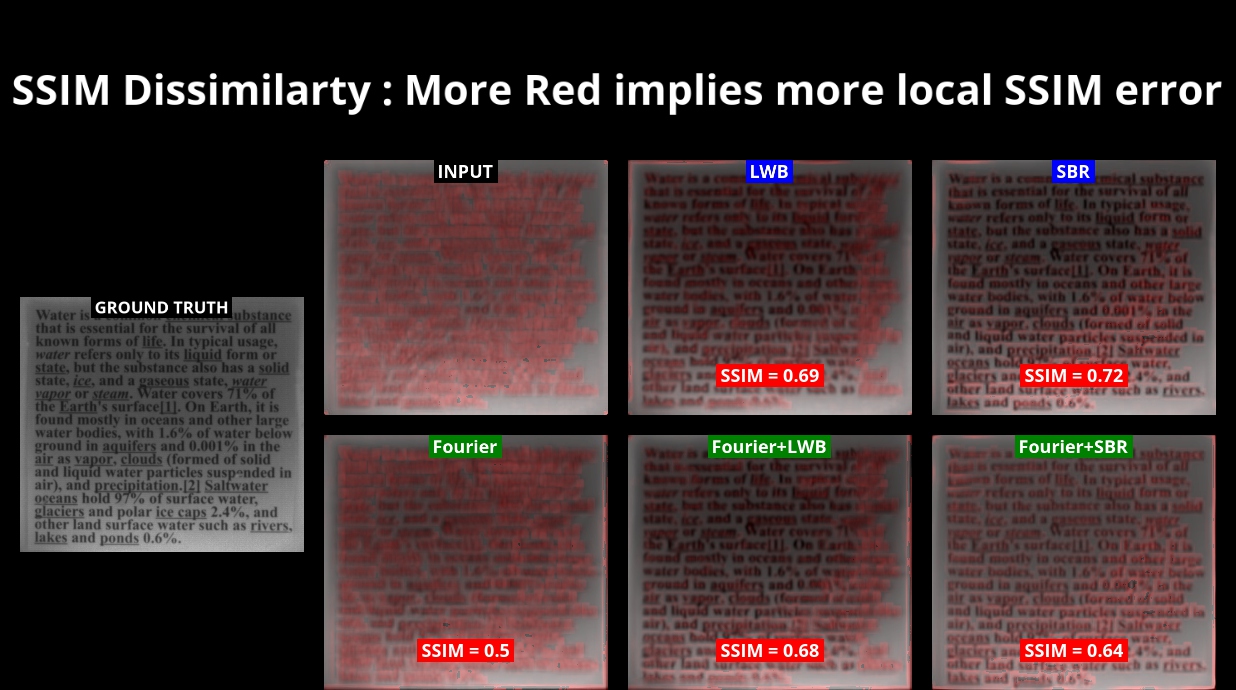

Supplement: Supplementary file 1 [file James_Fourier_Based_Pre-Processing_WACV_2020_supplemental.pdf › paper130_supplemental/Collage_Mean_Images/Images/Small_SSIM_Dissimilarity.jpg]

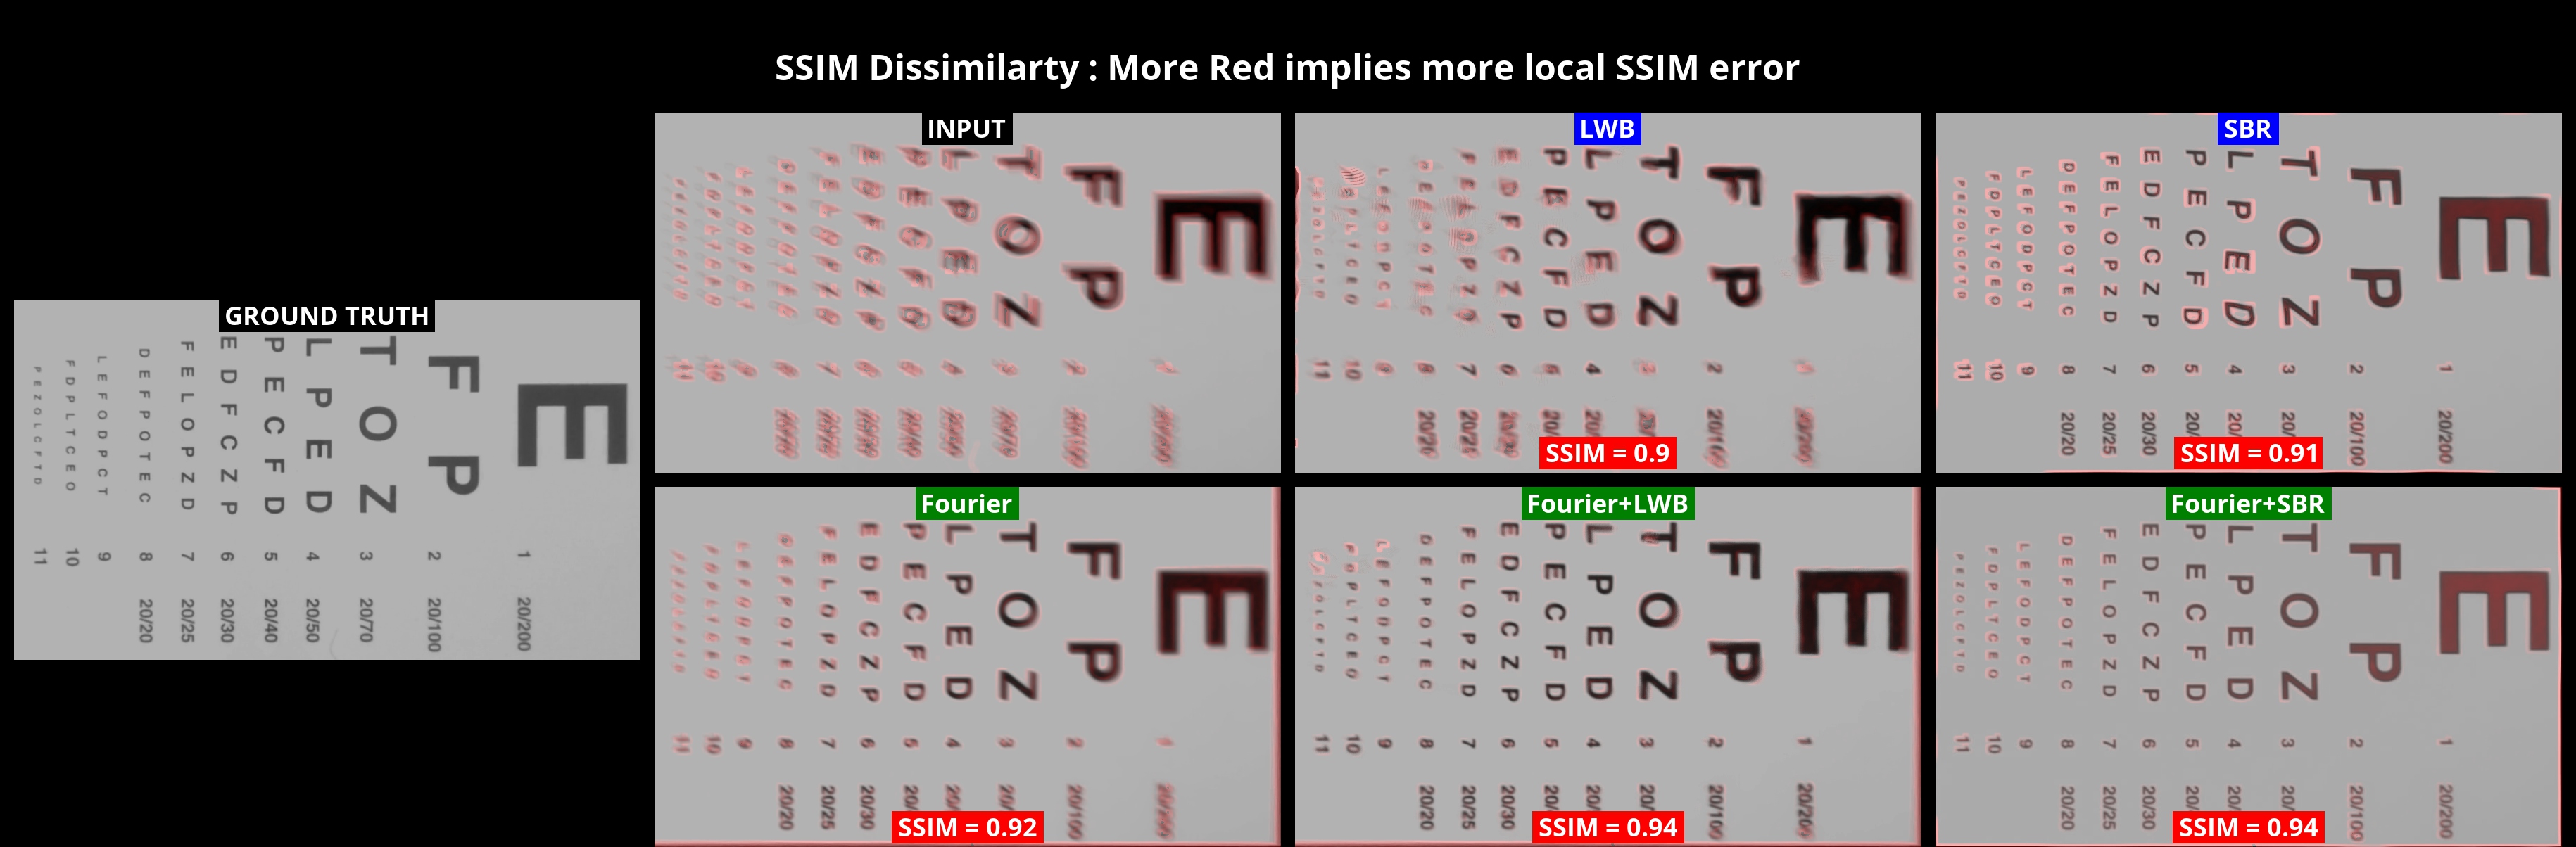

Supplement: Supplementary file 1 [file James_Fourier_Based_Pre-Processing_WACV_2020_supplemental.pdf › paper130_supplemental/Collage_Mean_Images/Images/Eye_SSIM_Dissimilarity.jpg]

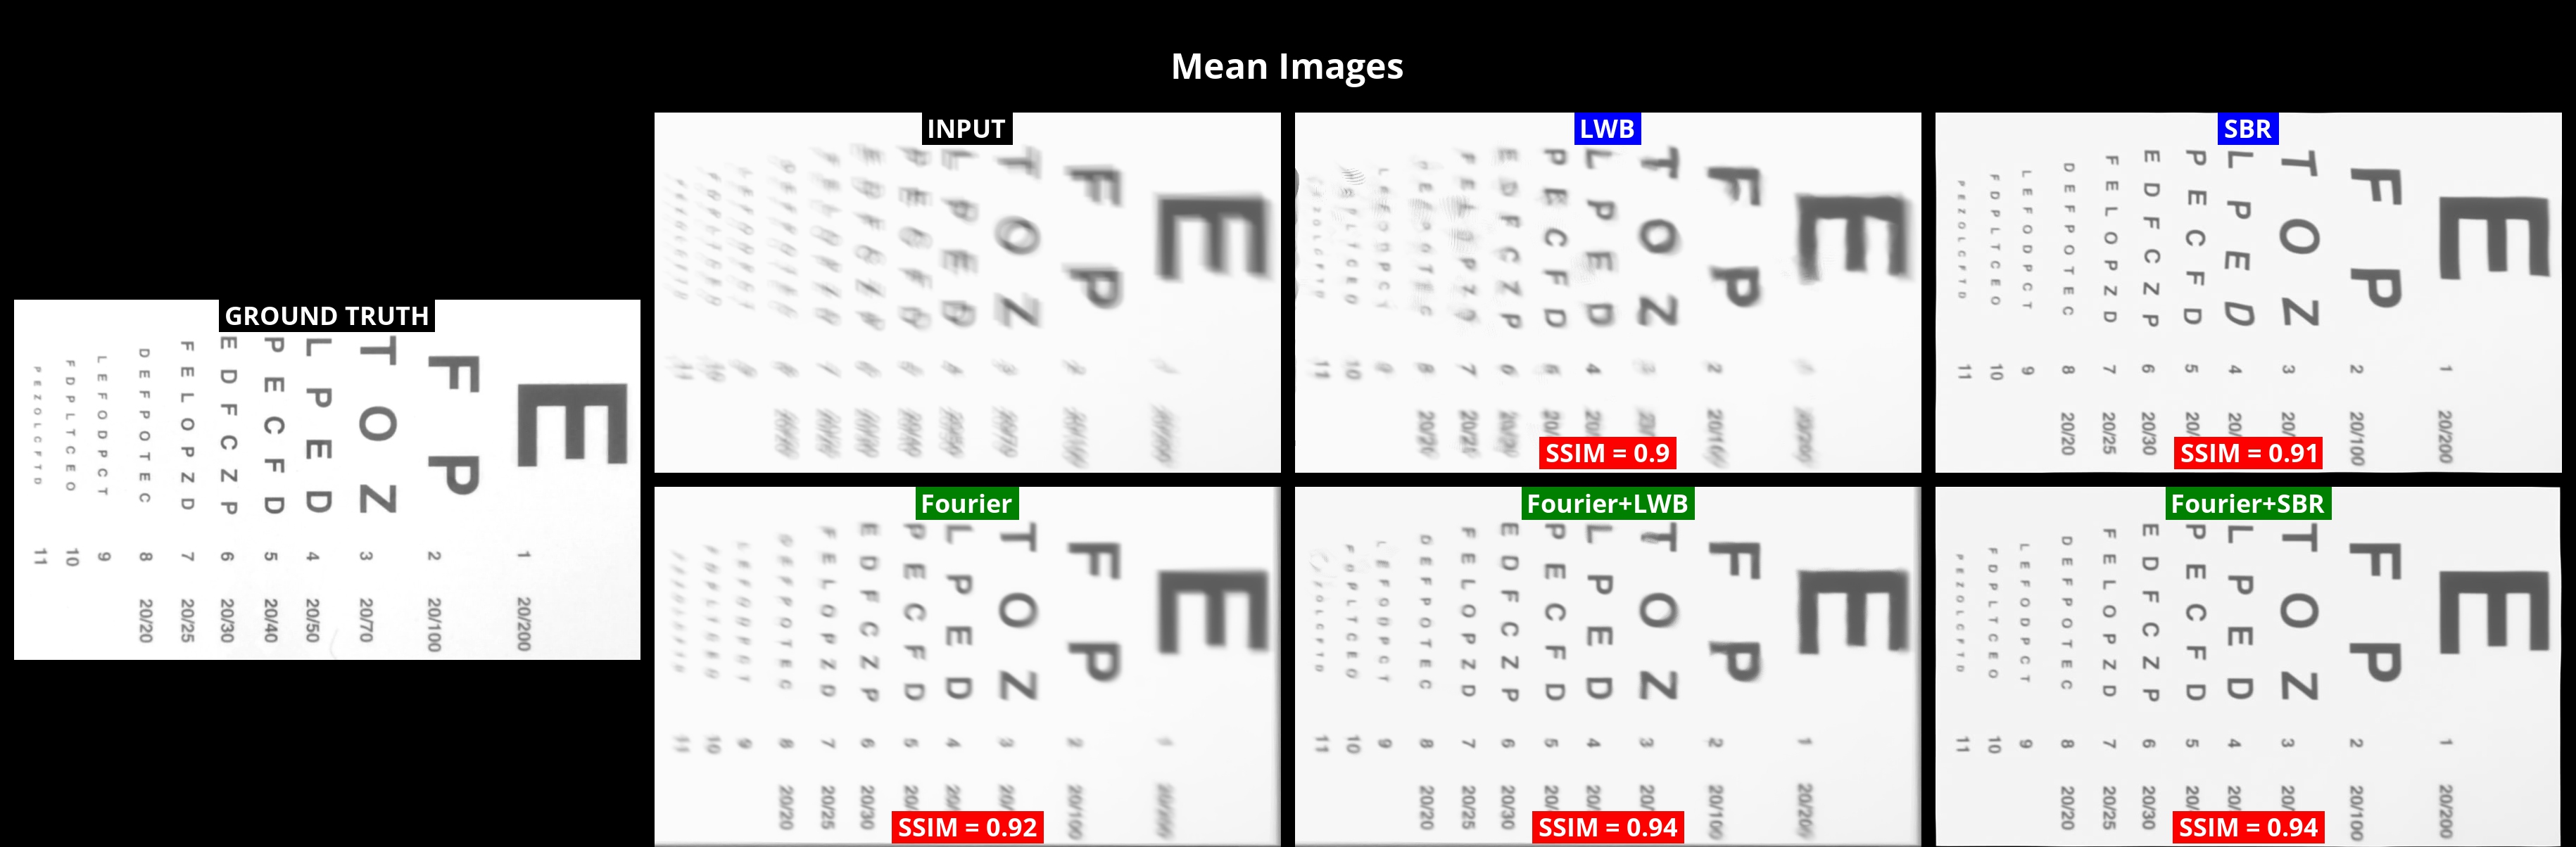

Supplement: Supplementary file 1 [file James_Fourier_Based_Pre-Processing_WACV_2020_supplemental.pdf › paper130_supplemental/Collage_Mean_Images/Images/Eye_Mean_Images.jpg]

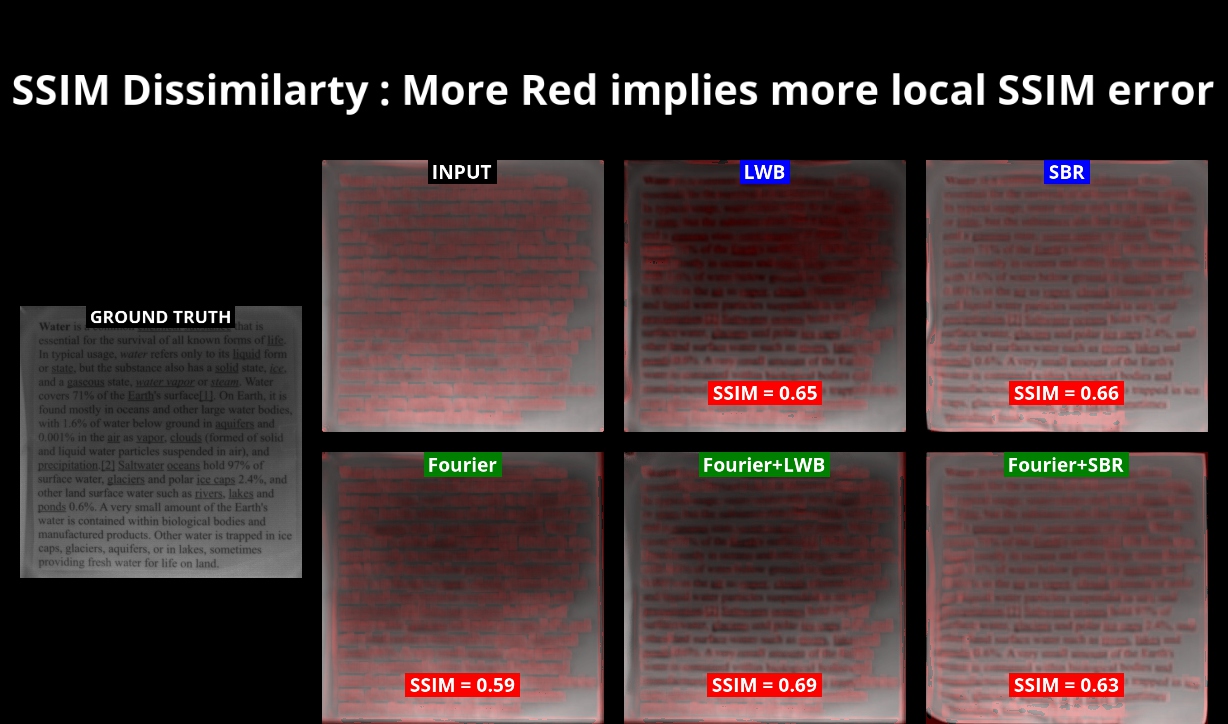

Supplement: Supplementary file 1 [file James_Fourier_Based_Pre-Processing_WACV_2020_supplemental.pdf › paper130_supplemental/Collage_Mean_Images/Images/Tiny_SSIM_Dissimilarity.jpg]

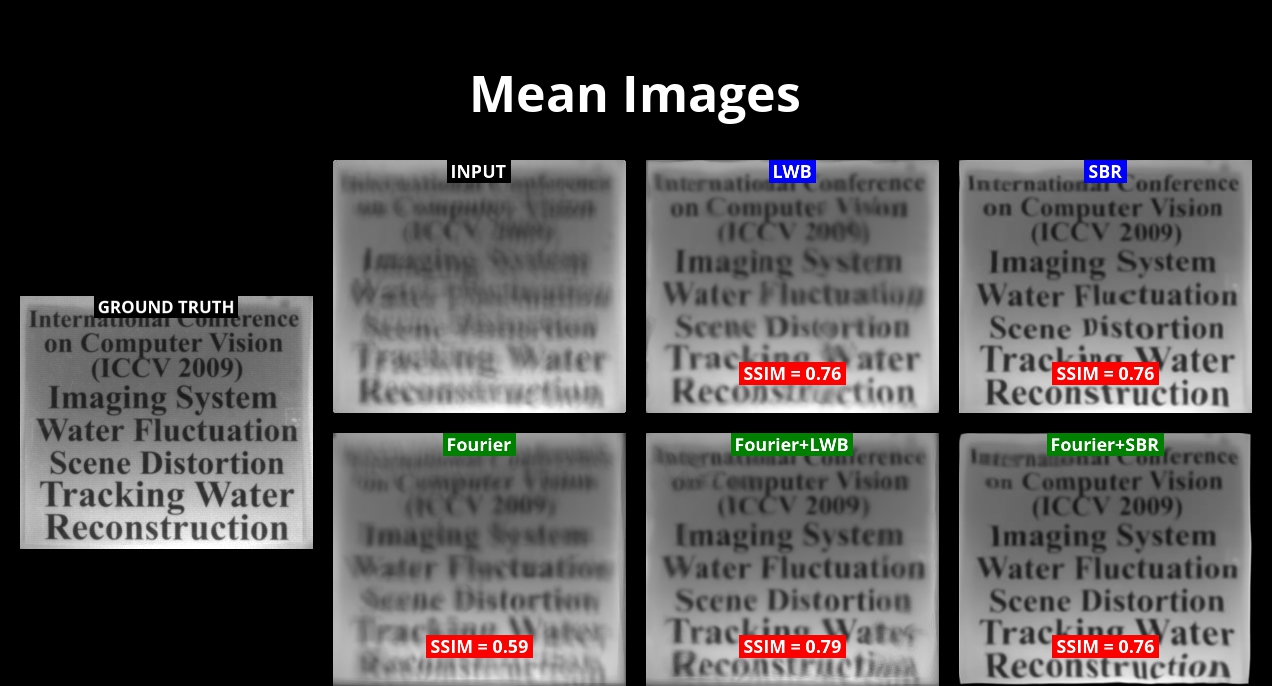

Supplement: Supplementary file 1 [file James_Fourier_Based_Pre-Processing_WACV_2020_supplemental.pdf › paper130_supplemental/Collage_Mean_Images/Images/Middle_Mean_Images.jpg]
